# Supplementary material
Source: PubMed Central journal article supplement (PMC5570660)
Supplement: NIHMS873908-supplement-1.pdf [file NIHMS873908-supplement-1.pdf]

A The linear predictor,  $X\beta$ , for risk of AKI in ICU patients estimated from logistic model is given by:  $\text{Prob}\{\text{AKI} = 1\} = 1/[1 + \exp(-X\beta)]$ , where

$X\beta =$

33.09418

- 0.1356124 × (age of patient in years at time of admission)
- + 0.0006794233 × (age - 0.3104723)<sup>3</sup> {×1 if age > 0.3104723, ×0 if not}
- 0.0009164567 × (age - 4.366872)<sup>3</sup> {×1 if age > 4.366872, ×0 if not}
- + 0.0002370334 × (age - 15.99398)<sup>3</sup> {×1 if age > 15.99398, ×0 if not}
  
- + 0.09985185 × (number of high risk nephrotoxins)
- + 0.7840496 × (number of moderate nephrotoxins)
- 0.1185471 × (total number of medications)
  
- 0.00351531 × (minimum platelet count)
- + 5.771816 × 10<sup>-9</sup> × (minimum platelet count - 110)<sup>3</sup> {×1 if plt > 110, ×0 if not}
- 1.970378 × 10<sup>-8</sup> × (minimum platelet count - 278)<sup>3</sup> {×1 if plt > 278, ×0 if not}
- + 1.393197 × 10<sup>-8</sup> × (minimum platelet count - 347.6)<sup>3</sup> {×1 if plt > 347.6, ×0 if not}
  
- + 0.263851 × (median RDW)
- 0.07609847 × (median RDW - 12.7)<sup>3</sup> {×1 if RDW > 12.7, ×0 if not}
- + 0.1049634 × (median RDW - 13.25)<sup>3</sup> {×1 if RDW > 13.25, ×0 if not}
- 0.02886494 × (median RDW - 14.7)<sup>3</sup> {×1 if RDW > 14.7, ×0 if not}
  
- 0.634771 {×1 if all Phosphorus below ULN; ×0 if not}
- + 1.074503 {×1 if one or more Phosphorus above ULN, ×0 if not}
  
- 1.683567 {×1 if all transaminases below ULN, ×0 if not}
- 0.5490133 {×1 if one or more transaminases above ULN; ×0 if not}
  
- 4.749266 × (minimum pH)
- + 10.82387 × (minimum pH - 7.091)<sup>3</sup> {×1 if pH > 7.091, ×0 if not}
- 50.33098 × (minimum pH - 7.31)<sup>3</sup> {×1 if pH > 7.31, ×0 if not}
- + 39.50712 × (minimum pH - 7.37)<sup>3</sup> {×1 if pH > 7.37, ×0 if not}
  
- + 0.2892442 {×1 if hypotension, ×0 if not}

B The linear predictor,  $X\beta$ , for risk of AKI in non-ICU patients estimated from logistic model is given by:  $\text{Prob}\{\text{AKI} = 1\} = 1/[1 + \exp(-X\beta)]$ , where

$X\beta =$

- 9.23834
- 0.04283898 × (age of patient in years at time of admission)
- 0.00002324064 × (age - 0.5607118)<sup>3</sup> {×1 if age > 0.5607118, ×0 if not}
- + 0.00004630597 × (age - 8.845996)<sup>3</sup> {×1 if age > 8.845996, ×0 if not}
- 0.00002306534 × (age - 17.19425)<sup>3</sup> {×1 if age > 17.19425, ×0 if not}
  
- 0.1246498 × (number of high risk nephrotoxins)
- + 0.2629128 × (number of moderate risk nephrotoxins)
- 0.114002 × (total number of medications)
  
- + 0.00007525359 × (minimum platelet count)
- 7.574603 × 10<sup>-8</sup> × (minimum platelet count - 185)<sup>3</sup> {×1 if plt > 185, ×0 if not}
- + 1.709404 × 10<sup>-7</sup> × (minimum platelet count - 278)<sup>3</sup> {×1 if plt > 278, ×0 if not}
- 9.519434 × 10<sup>-8</sup> × (minimum platelet count - 352)<sup>3</sup> {×1 if plt > 352, ×0 if not}
  
- + 0.7009481 × (median RDW)
- 0.2161525 × (median RDW - 12.75)<sup>3</sup> {×1 if RDW > 12.75, ×0 if not}
- + 0.2808688 × (median RDW - 13.25)<sup>3</sup> {×1 if RDW > 13.25, ×0 if not}
- 0.06471632 × (median RDW - 14.92)<sup>3</sup> {×1 if RDW > 14.92, ×0 if not}
  
- 0.01514728 {×1 if all Phosphorus below ULN; ×0 if not}
- + 0.8270704 {×1 if one or more Phosphorus above ULN, ×0 if not}
  
- 0.9165366 {×1 if all transaminases below ULN, ×0 if not}
- 0.7049327 {×1 if one or more transaminases above ULN; ×0 if not}
